# Supplementary material
Source: PubMed Central journal article supplement (PMC2703603)

### Supplemental Fig. 3

**A**

Probe: PAC-CRE

Time (mins): 0 15 30 45 60 120 240

specific  
binding |

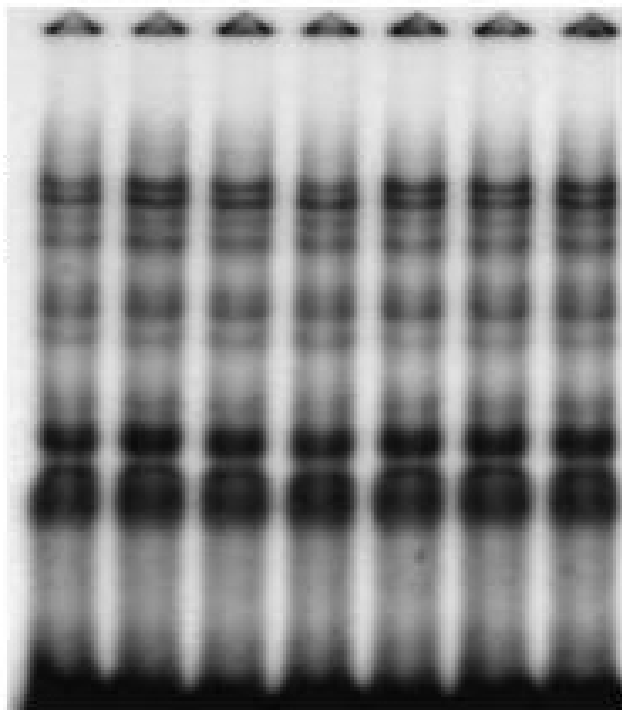

**B**

Probe: PAC-AP1

Time (mins): 0 15 30 45 60 120 240

specific  
binding |

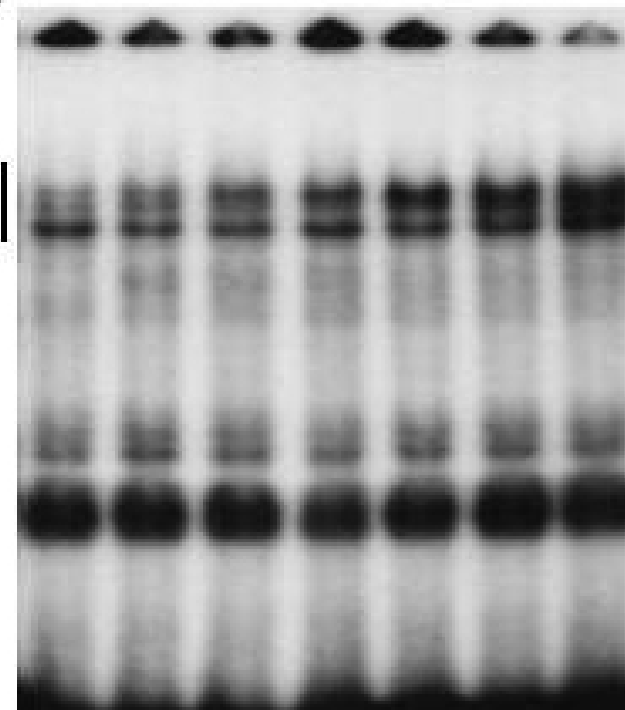

Supplement: me.2008-0477_3.pdf [file me.2008-0477_3.pdf]
