# Supplementary material
Source: PubMed Central journal article supplement (PMC2703603)
Supplement: me.2008-0477_6.pdf [file me.2008-0477_6.pdf]

**Supplemental Table 1**

| <b>Name of oligonucleotide</b> | <b>Sequence (mutated residues underlined) or Probe ID</b>                             |
|--------------------------------|---------------------------------------------------------------------------------------|
| <b>PCR</b>                     |                                                                                       |
| PACAP (mouse/rat)              | Forward 5' - GAT GTC GCC CAC GAA ATC CT - 3'                                          |
|                                | Reverse 5' - AGT GAT GAC TGG TCA GTC AA - 3'                                          |
| $\alpha$ -Tubulin (mouse)      | Forward 5' - CCA TCC ACC CGG CTG CCG - 3'                                             |
|                                | Reverse 5' - CCG TAA TCC ACA GAG AGC C - 3'                                           |
| <b>qPCR</b>                    |                                                                                       |
| Eukaryotic 18S rRNA            | Applied Biosystems P/N 4319413E                                                       |
| Cyclophilin B, mouse           | Applied Biosystems Mm00478295_m1                                                      |
| CREB1, mouse                   | Applied Biosystems Mm00501607_m1                                                      |
| PACAP, mouse                   | Applied Biosystems Mm00437433_m1                                                      |
| cFos, mouse                    | Applied Biosystems Mm00487425_m1                                                      |
| JunB, mouse                    | Applied Biosystems Mm00492781_s1                                                      |
| <b>EMSA</b>                    |                                                                                       |
| PAC-CRE (-218/-186)            | 5' - GGG ACT AGG ATG CTG ACG TCT TTT ACT GAT ACC - 3'                                 |
| PAC-CREmut                     | 5' - GGG ACT AGG ATG CTG <u>TGG</u> TCT TTT ACT GAT ACC - 3'                          |
| Consensus CRE (CRE)            | 5' - AGA GAT TGC CTG ACG TCA GAG AGC TAG - 3'                                         |
| Consensus AP-1 (AP1)           | 5' - CGC TTG ATG ACT CAG CCG GAA - 3'                                                 |
| PAC-AP1 (-285/-259)            | 5' - CAG AAG CTG ATG ACT CCG GAT CTT ATC - 3'                                         |
| PAC-AP1mut                     | 5' - CAG AAG CTG ATG <u>TCT CGA</u> GAT CTT ATC - 3'                                  |
| <b>Mutagenesis</b>             |                                                                                       |
| mutAP1(-448)                   | 5' - GAT GGG TCA TTG GTG <u>GCG</u> GGT <u>TGG</u> GTA CCA TGT AAA AAG AAG CAG G - 3' |
| mutAP1(-275)                   | 5' - GGT GTT TAT CAG AAG CTG ATG <u>TCT CGA</u> GAT CTT ATC ATC CTG G - 3'            |
| mutCRE(-179)                   | 5' - CTG ATA CCG GAT <u>CCT</u> <u>TTG</u> GTG ACT GGG AAA AAA GG - 3'                |
| <b>ChIP</b>                    |                                                                                       |
| AP1/CRE (-308/-168)            | forward 5' - TTG TGT GAG TGA AAG GTG TTT ATC AGA - 3'                                 |
|                                | reverse 5' - CCA GTC ACG TAA TGA TCC GGT AT - 3'                                      |
| 5'-Promoter (-2787/-2658)      | forward 5' - TTT TCC ACA ACC TTC CTC AAT TTC - 3'                                     |
|                                | reverse 5' - GTG CTT GGT GTC TGG AGA TCA G - 3'                                       |
