# Supplementary material
Source: PubMed Central journal article supplement (PMC2703603)

# Supplemental Fig. 1

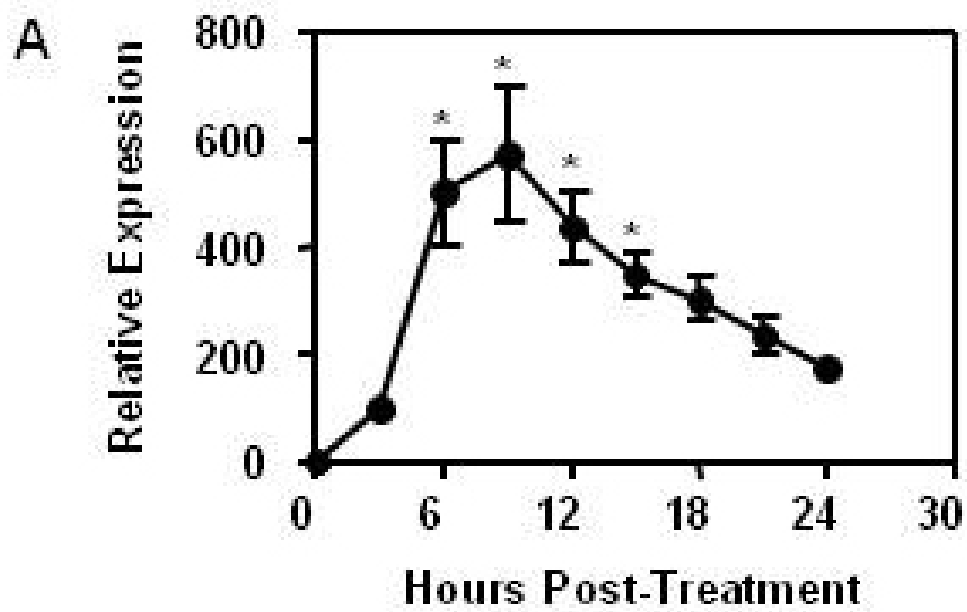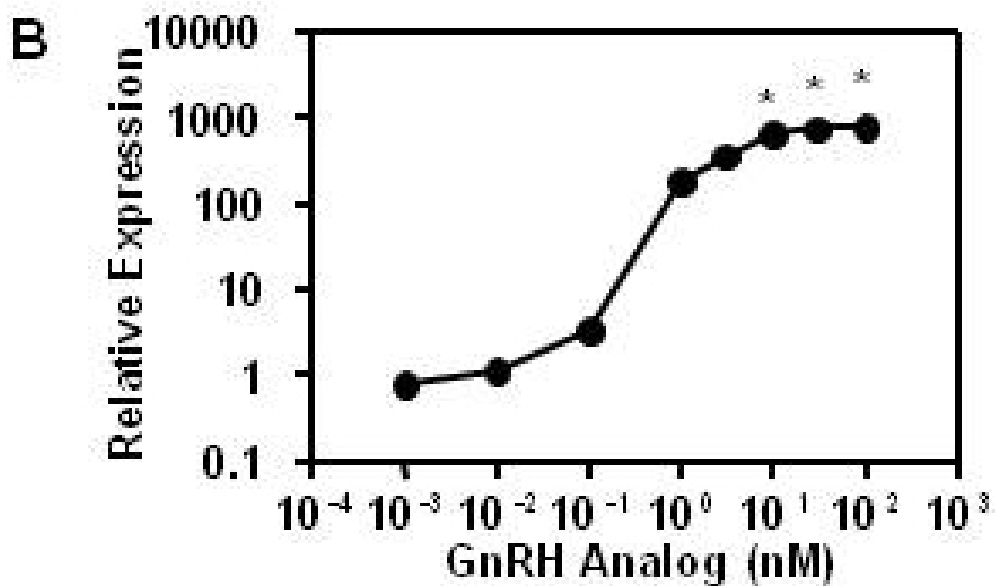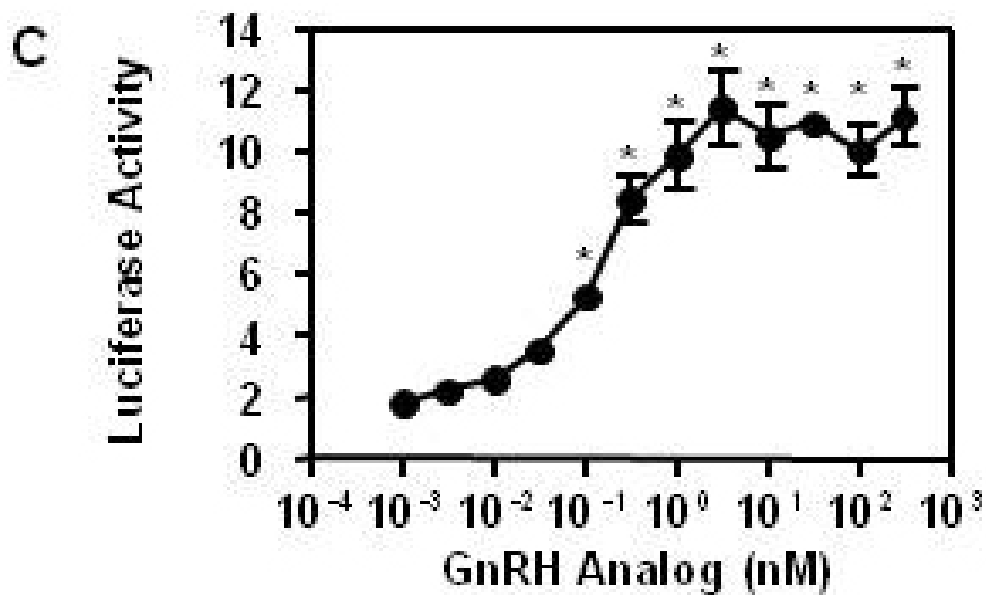

Supplement: me.2008-0477_1.pdf [file me.2008-0477_1.pdf]

Supplemental Fig. 2

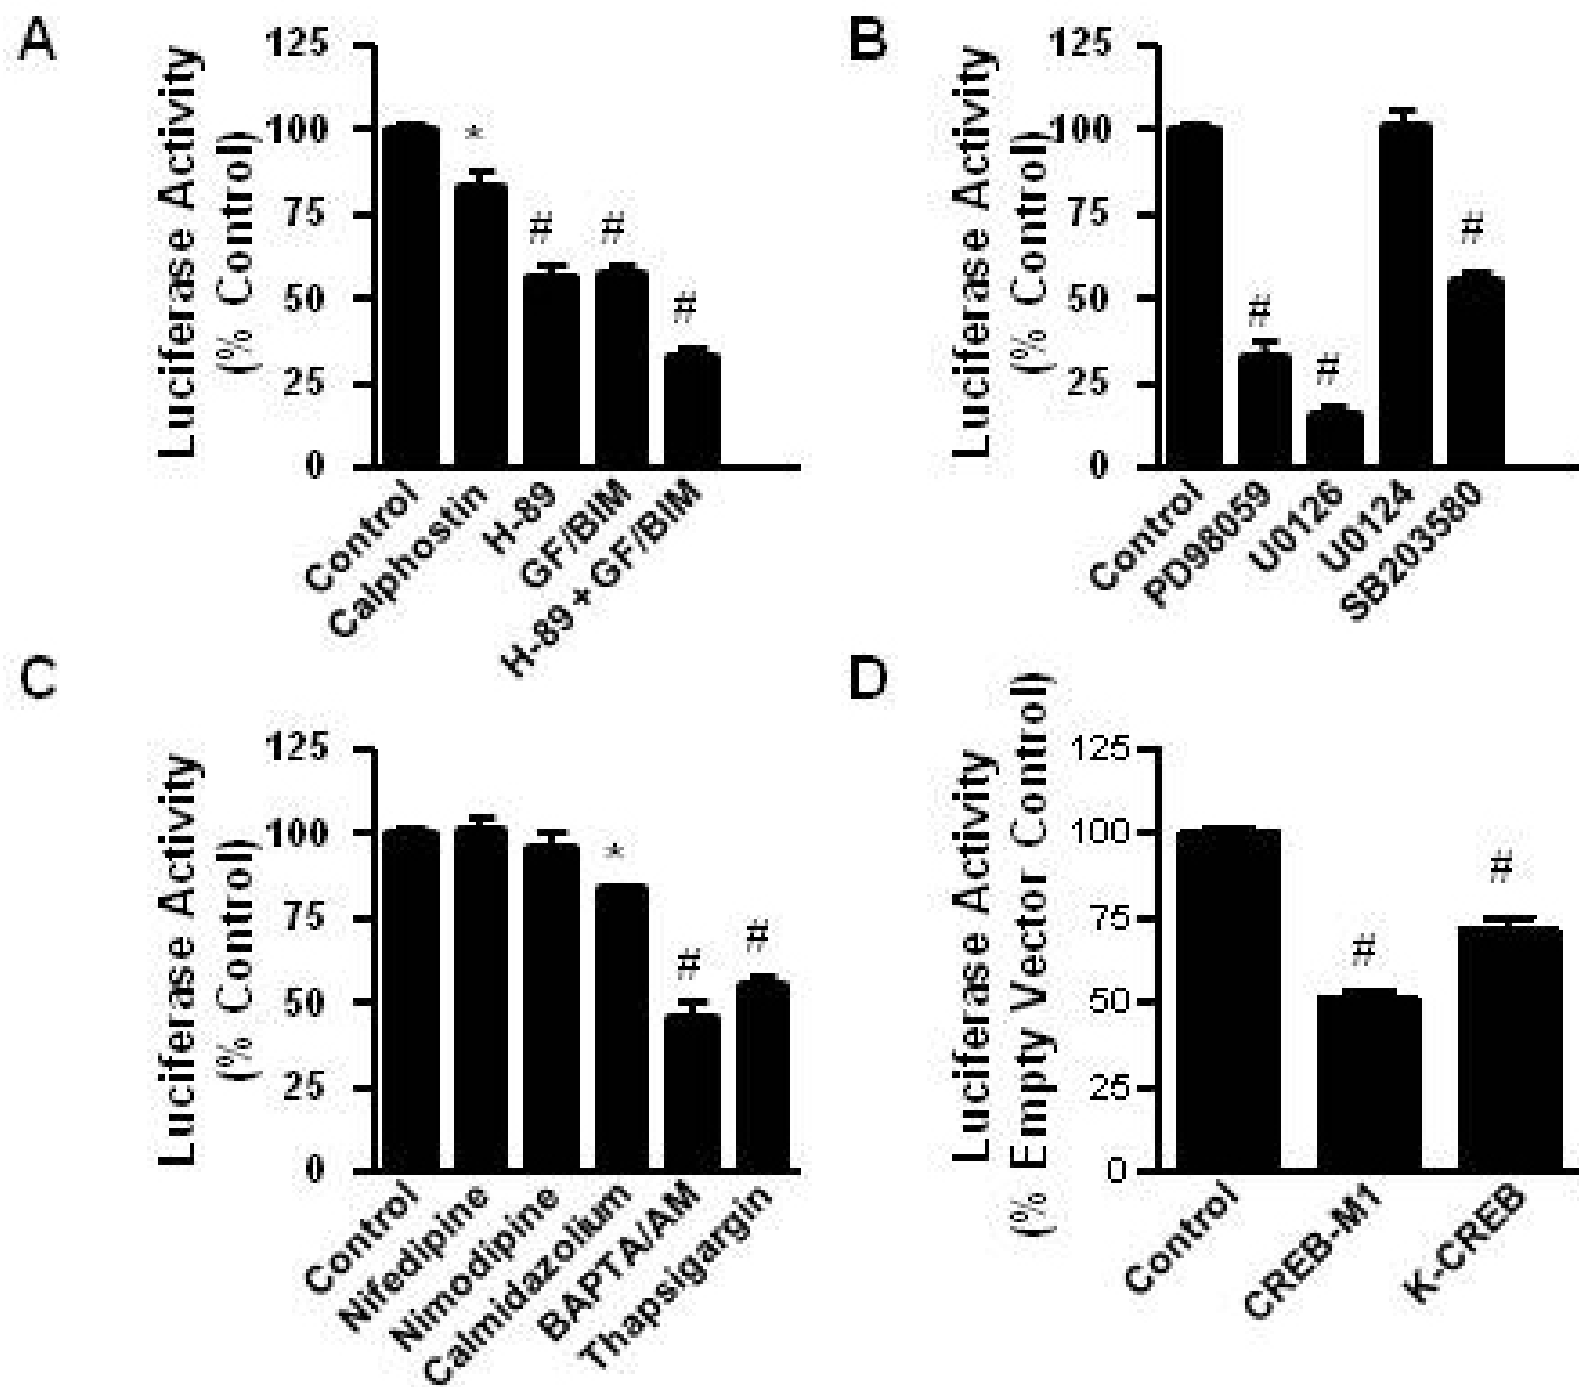

Supplement: me.2008-0477_2.pdf [file me.2008-0477_2.pdf]

Supplemental Fig. 4

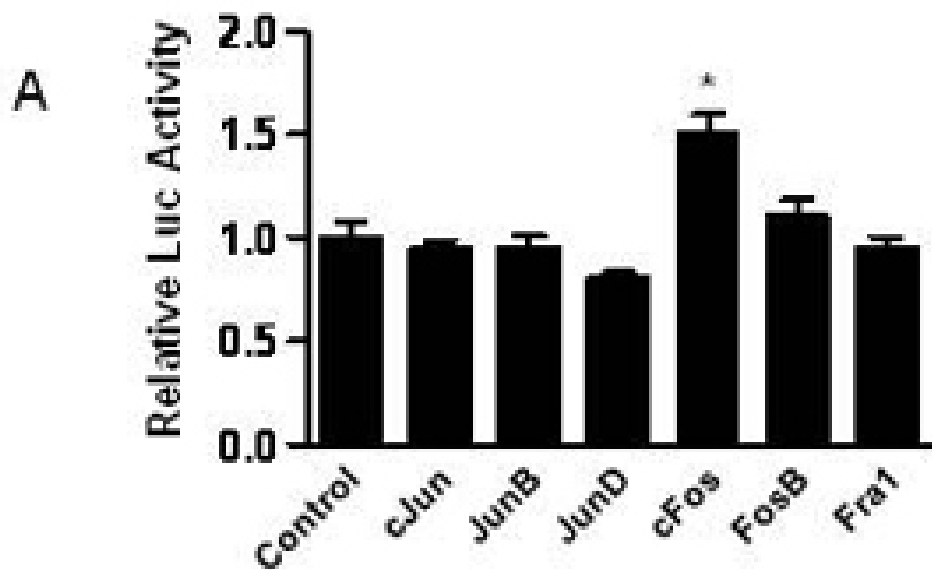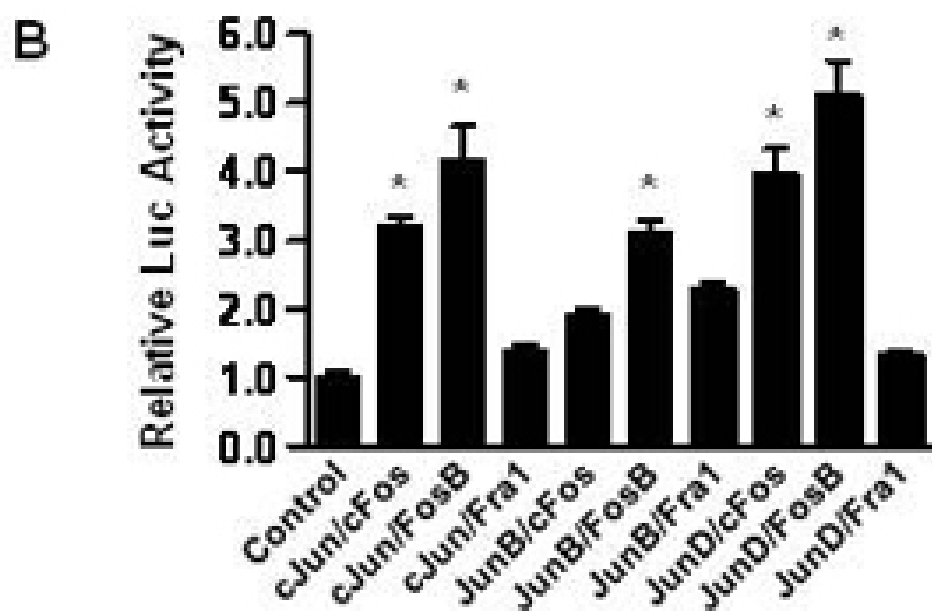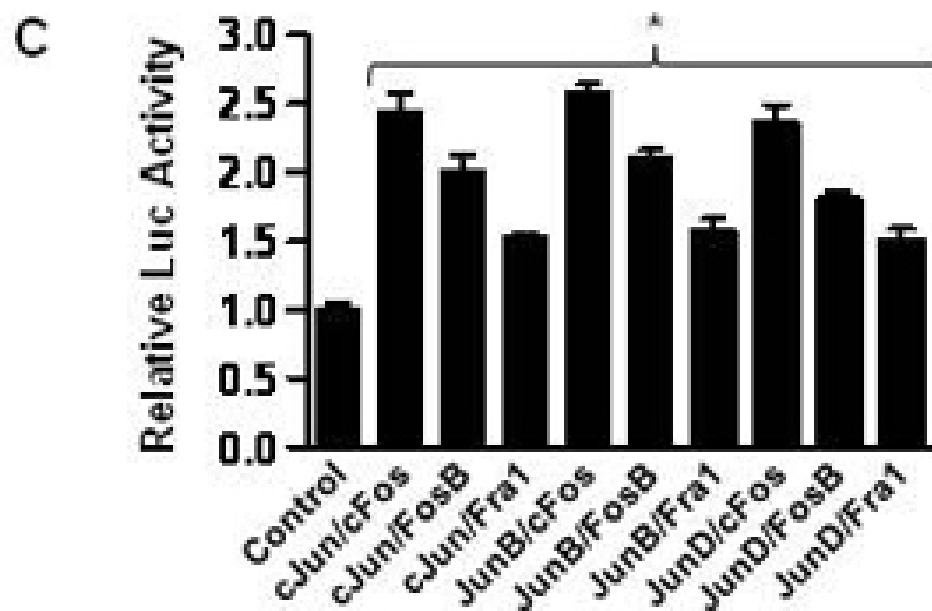

Supplement: me.2008-0477_4.pdf [file me.2008-0477_4.pdf]
